# Supplementary material
Source: PubMed Central journal article supplement (PMC2154444)

(A)

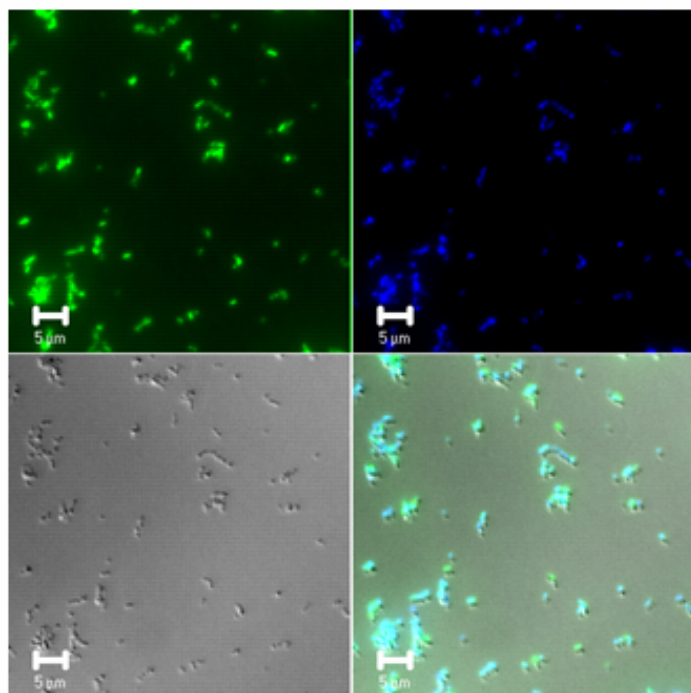

(B)

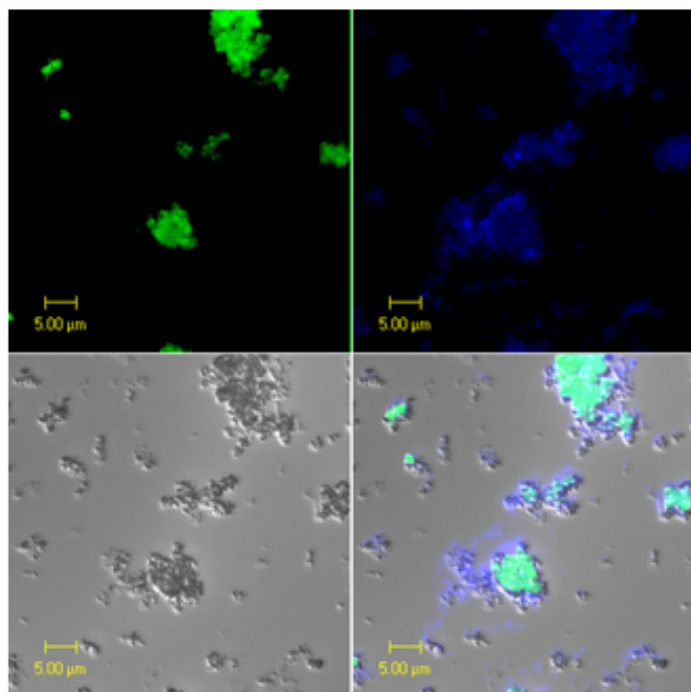

Supplement: supp_0707595104_07595Fig10.pdf [file supp_0707595104_07595Fig10.pdf]

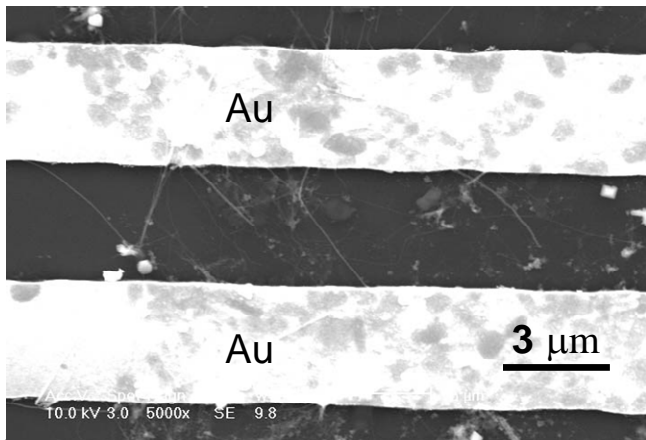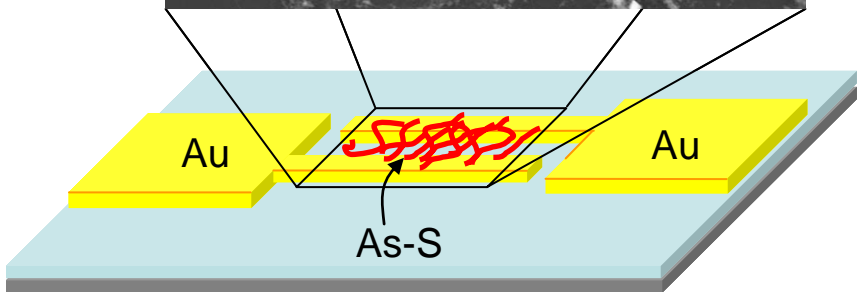

Supplement: supp_0707595104_07595Fig11.pdf [file supp_0707595104_07595Fig11.pdf]

**(A)**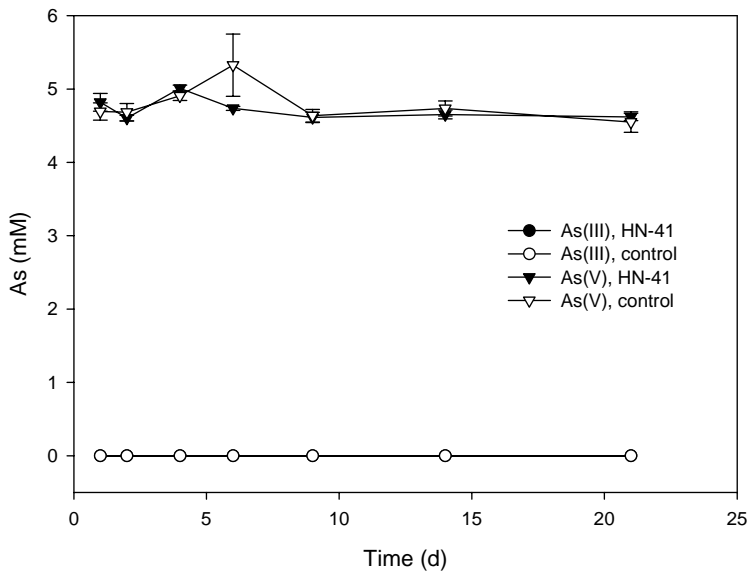**(B)**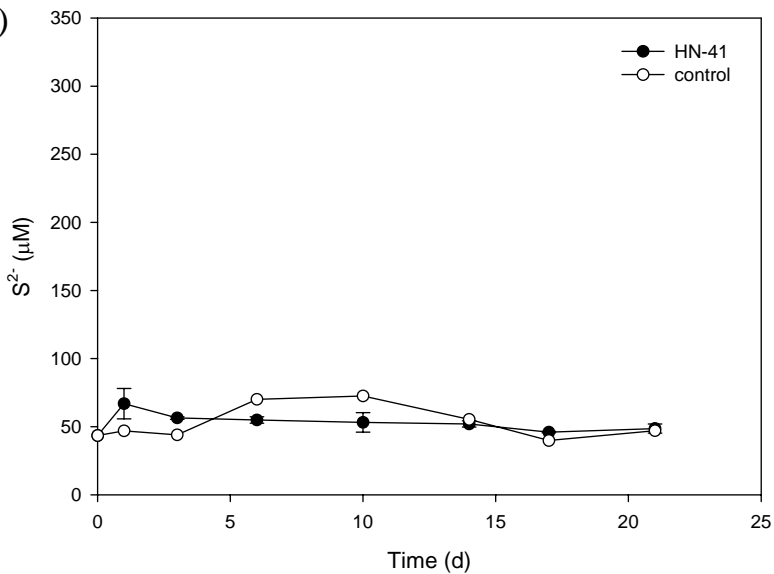

Supplement: supp_0707595104_07595Fig6.pdf [file supp_0707595104_07595Fig6.pdf]

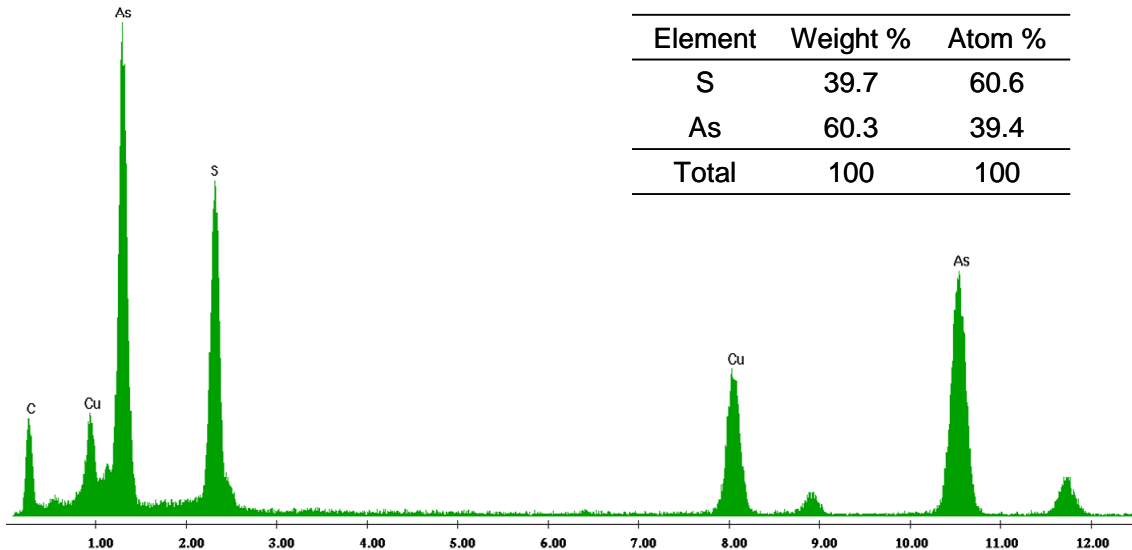

| Element | Weight % | Atom % |
|---------|----------|--------|
| S       | 39.7     | 60.6   |
| As      | 60.3     | 39.4   |
| Total   | 100      | 100    |

Supplement: supp_0707595104_07595Fig7.pdf [file supp_0707595104_07595Fig7.pdf]

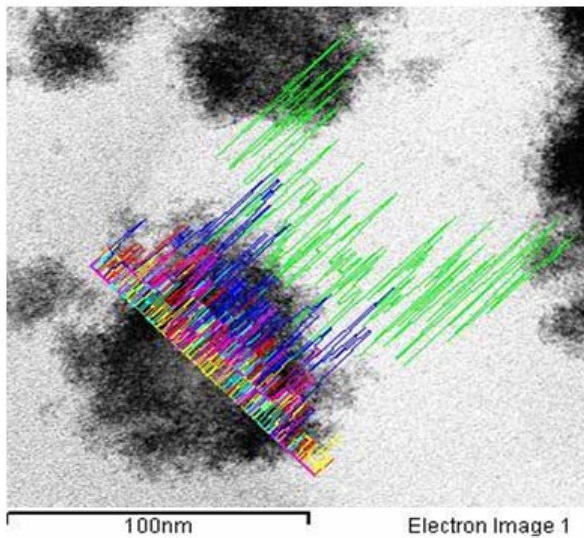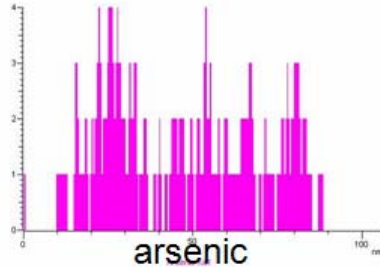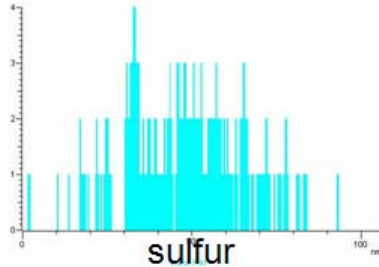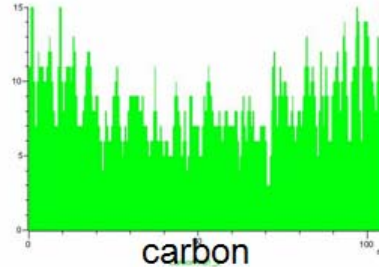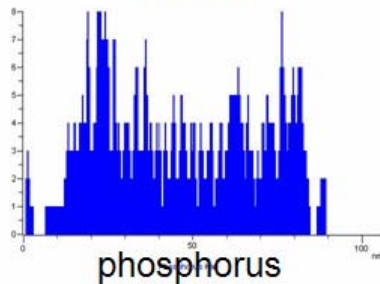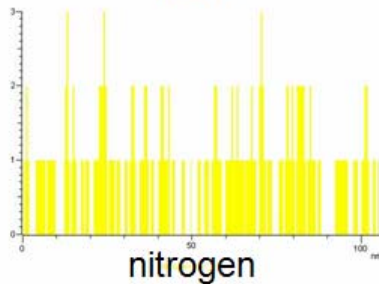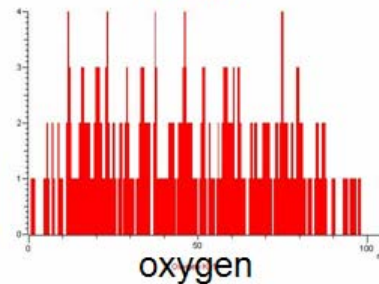

Supplement: supp_0707595104_07595Fig8.pdf [file supp_0707595104_07595Fig8.pdf]

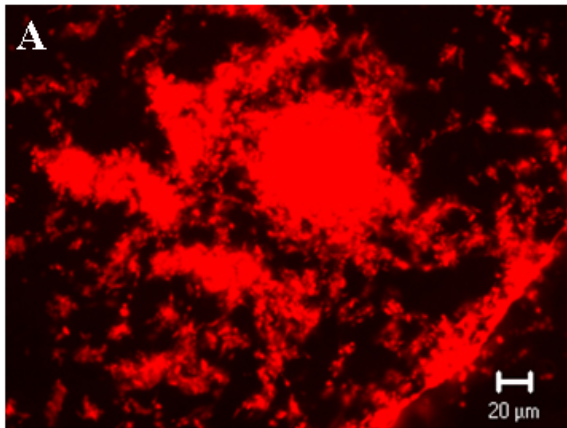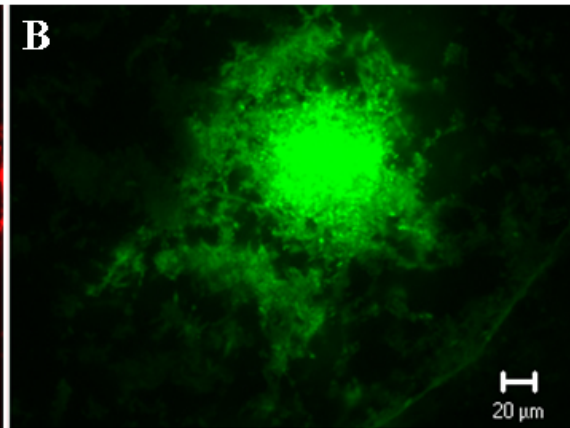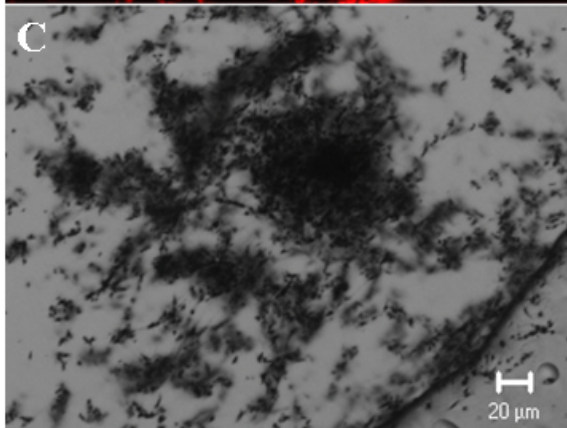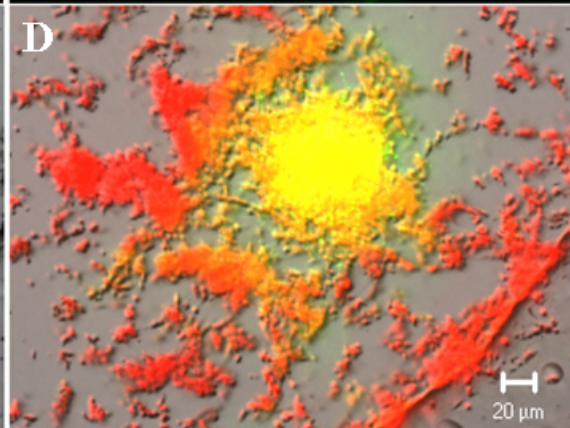

Supplement: supp_0707595104_07595Fig9.pdf [file supp_0707595104_07595Fig9.pdf]
